# Supplementary material for: Transcriptional regulatory networks underlying gene expression changes in Huntington's disease
Source: PubMed Central journal article supplement (PMC5868199; doi:10.15252/msb.20167435), 2018-03-26
Supplement: MSB-14-e7435-s001.pdf [file MSB-14-e7435-s001.pdf]

## Appendix Information

**Appendix Figure S1. Comparison of TF binding site predictions to ChIP-seq data.** For each of 52 TFs, we compared the sets of genes adjacent to predicted TF binding sites in our model to the sets of genes adjacent to observed binding sites from ChIP-seq studies. **a.**  $-\log_{10}(\text{p-values})$  for overlap between modeled vs. observed gene sets (Fisher's exact test). **b.** Distribution of recall (sensitivity) and precision (positive predictive accuracy) of the TFBS model for identifying the target genes of each TF identified by ChIP-seq.

**Appendix Figure S2. Association between TRN prediction accuracy and expression level.** Each point on the scatterplot represents the mean expression level of a gene in the striatum (x-axis; fragments per kilobase million, FPKM) and the prediction accuracy for that gene in the transcriptional regulatory network model ( $r^2$ , predicted vs. observed expression across all samples).

**Appendix Figure S3. TFs with >1,000 predicted target genes.** Bars indicate the number of predicted target genes for each of the 15 TFs with >1,000 predicted target genes in the TRN model for the mouse striatum.

**Appendix Figure S4. Enrichments of TF modules within each striatal cell type.** Enrichments of the predicted target genes of each TF for genes expressed specifically in one of seven major cell types in the mouse striatum. The top 20 TF modules are shown for each cell type, ranked by the  $-\log_{10}(\text{p-value})$  for the strength of enrichment in a one-sided Fisher's exact test.

**Appendix Figure S5. Core regulator TFs are differentially expressed in the striatum of HD CAG knock-in mice.** z-scores indicate significance and direction of expression changes in each condition, relative to age-matched *Htt*<sup>Q20/+</sup> mice.

**Appendix Figure S6. Reconstruction of a TRN model of the human striatum.** a. Training (black) and test set (blue) prediction accuracy for genes in the human striatum TRN model. b. Distribution for the number of predicted regulators per target gene. c. Distribution for the number of predicted target genes per TF. d. Enrichment of down-regulated core regulator TFs identified in mouse striatum for down-regulated genes in HD cases vs. controls. e. Enrichment of up-regulated core regulator TFs identified in mouse striatum for up-regulated genes in HD cases vs. controls.

**Appendix Figure S7. Enrichments of target genes of striatal core regulator TFs for Htt CAG-length dependent gene expression changes in cortex, hippocampus, cerebellum, and liver.** Heatmap color indicates the  $-\log_{10}(\text{p-value})$  for the enrichment of each TF's predicted target genes in each tissue (Fisher's exact test). In each tissue, we tested for enrichment separately in each age x Htt allele condition (three ages: 2-month-old, 6-month-old, 10-month-old; five genotypes: Q80, Q92, Q111, Q140, Q175). In addition, enrichments were calculated separately for down-regulated and for up-regulated genes (edgeR,  $p < 0.01$ ). The color on the heatmap corresponds to the lowest enrichment p-value for each TF within each tissue. The 13 TFs whose target genes were consistently enriched for gene expression changes across four

independent striatal datasets are indicated in bold with asterisks. STR, striatum; CTX, cortex; HIP, hippocampus; CB, cerebellum.

**Appendix Figure S8. Effects of age- and *Htt* genotype on abundance of SMAD3 and phospho-Ser423/425-SMAD3 protein.** a. Representative western blots of striatal tissue from 4- and 11-month-old *Htt*<sup>Q111/+</sup> and wildtype mice. Actin levels and two mice per genotype and age are shown for illustrative purposes. b. Quantification of phospho-SMAD3 signal (ANOVA, Genotype:  $F_{(1,16)} = 2.713, p = 0.119$ ; Age:  $F_{(1,16)} = 6.509, p = 0.021$ ; Interaction:  $F_{(1,16)} = 0.007, p = 0.934$ ). c. Quantification of total SMAD3 signal (ANOVA, Genotype:  $F_{(1,16)} = 0.487, p = 0.495$ ; Age:  $F_{(1,16)} = 0.506, p = 0.487$ ; Interaction:  $F_{(1,16)} = 1.085, p = 0.313$ ). d. phospho-SMAD3 to total SMAD3 ratio (ANOVA, Genotype:  $F_{(1,16)} = 3.714, p = 0.072$ ; Age:  $F_{(1,16)} = 4.590, p = 0.048$ ; Interaction:  $F_{(1,16)} = 0.304, p = 0.589$ ). Box plots: box represents first and third quartiles, whiskers represent data within 1.5 times the interquartile range (IQR), and points represent any data beyond 1.5 times the IQR.

**Appendix Table S1. GO enrichments of top 837 SMAD3 target genes.**

Appendix Figure S1

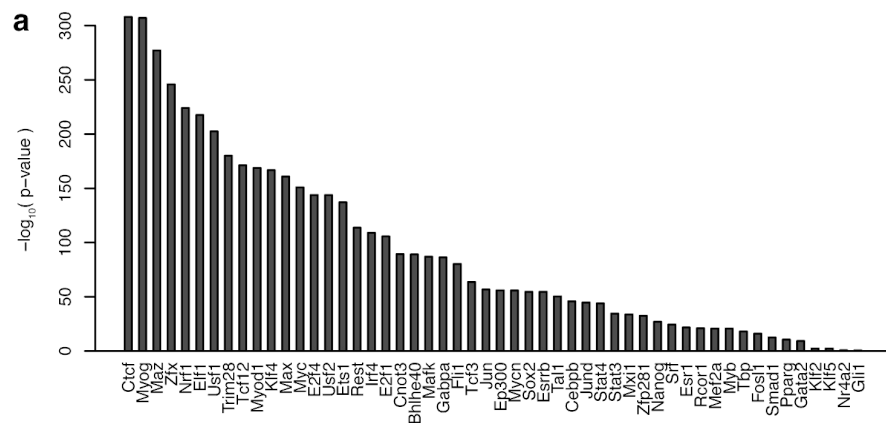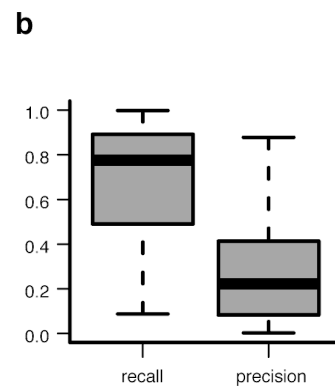

Appendix Figure S2

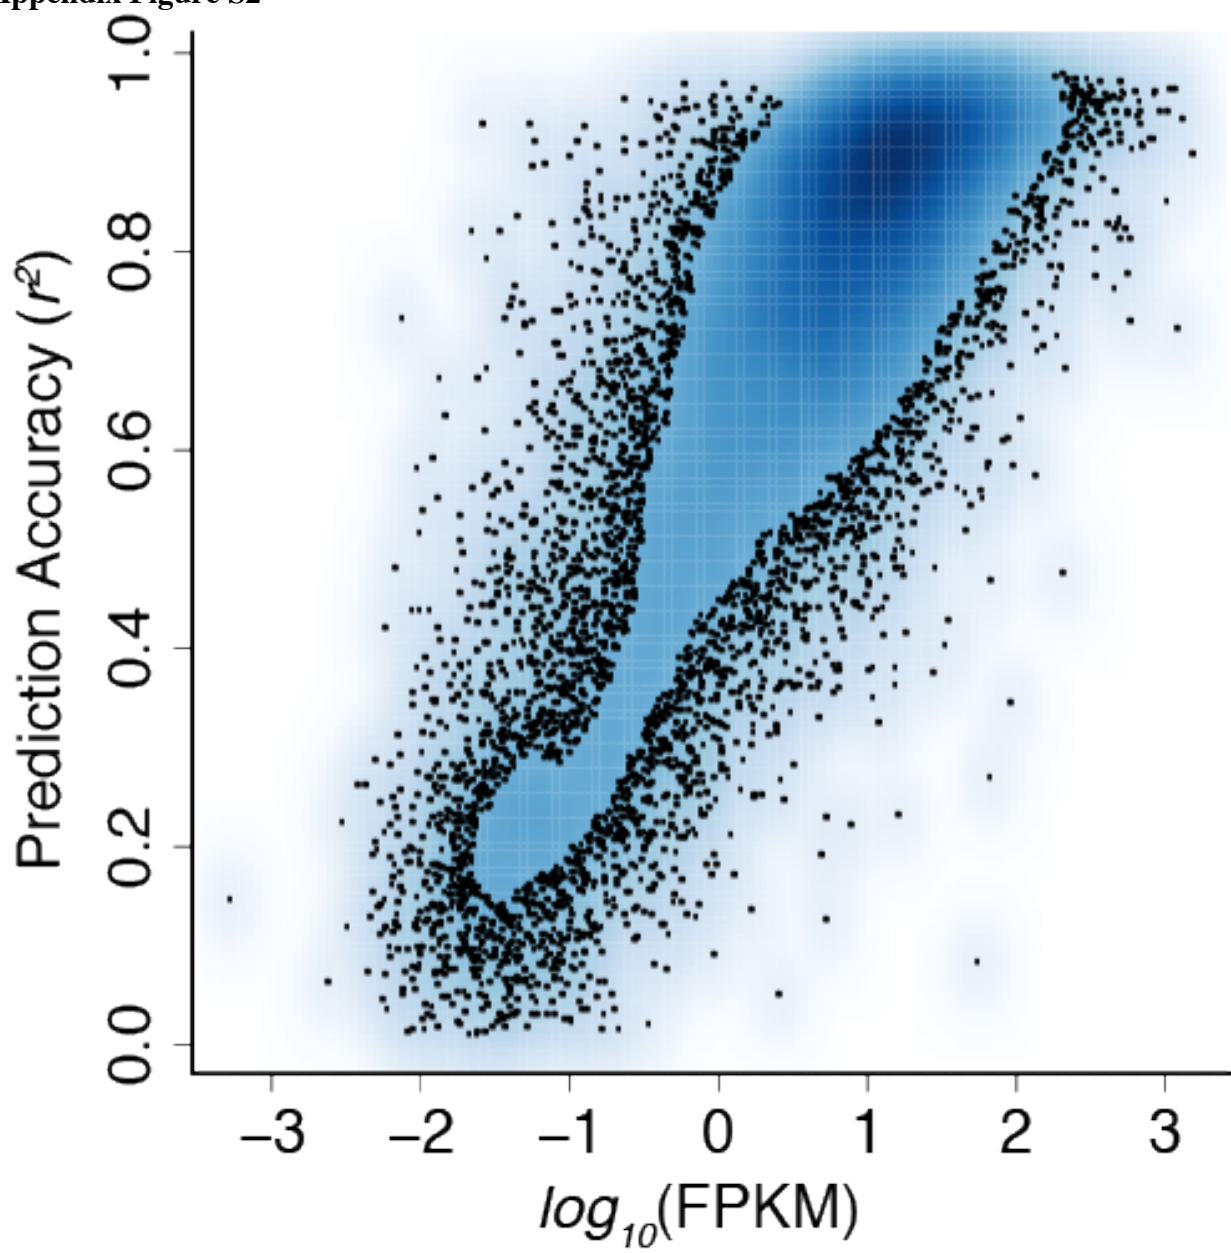

Appendix Figure S3

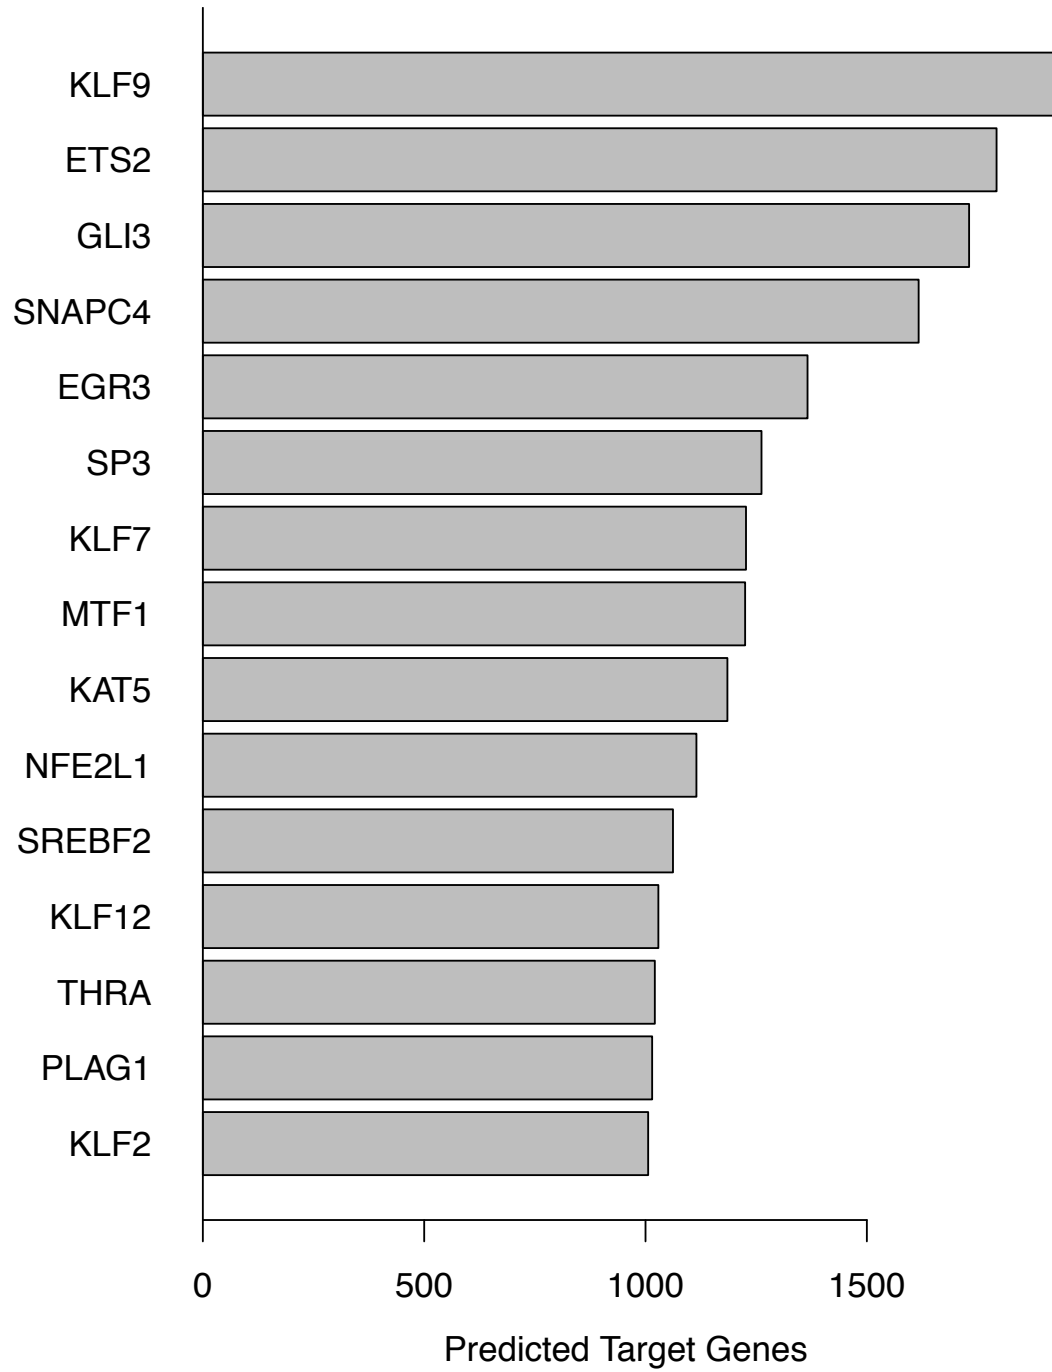

## Appendix Figure S4

### D1.Neuron

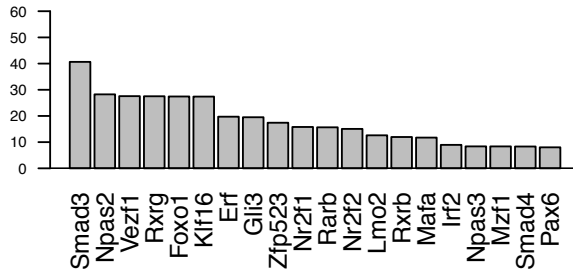

### D2.Neuron

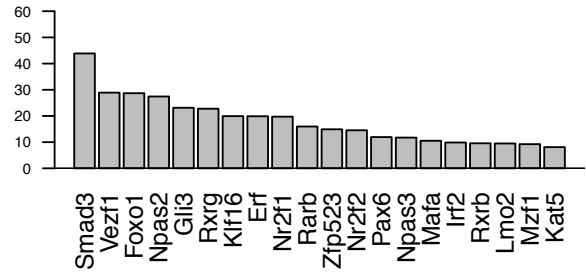

### Chat.Neuron

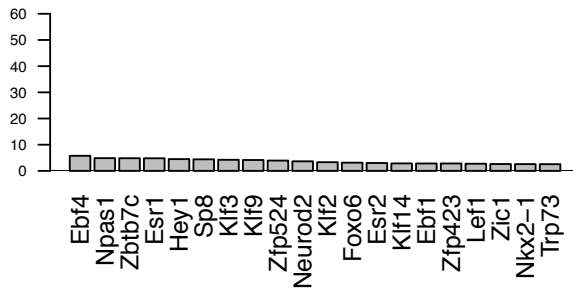

### Astrocytes

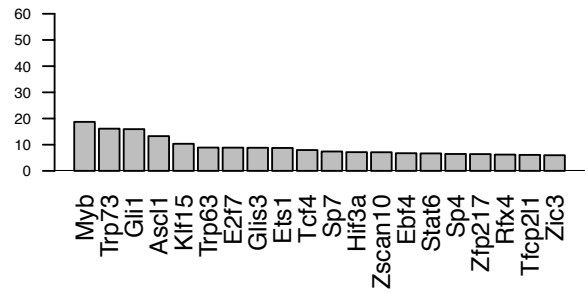

$-\log_{10}(p\text{-value})$

### Myelinating.Oligodendrocytes

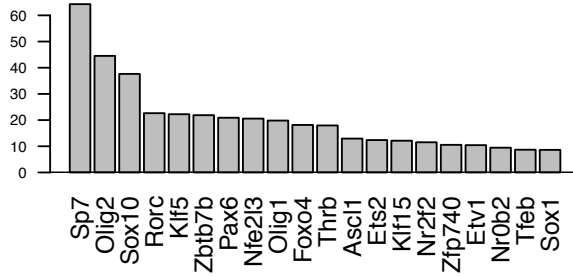

### Microglia

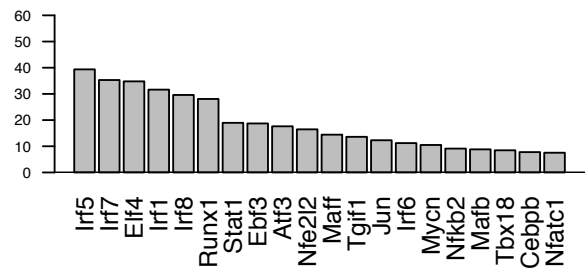

### Endothelial.Cells

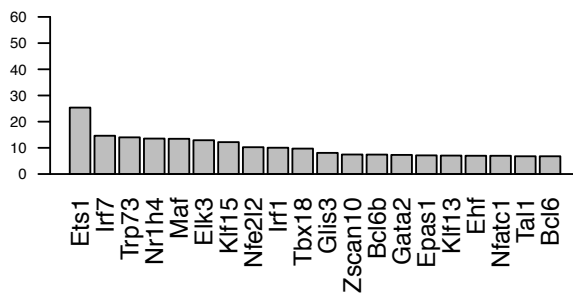

Appendix Figure S5

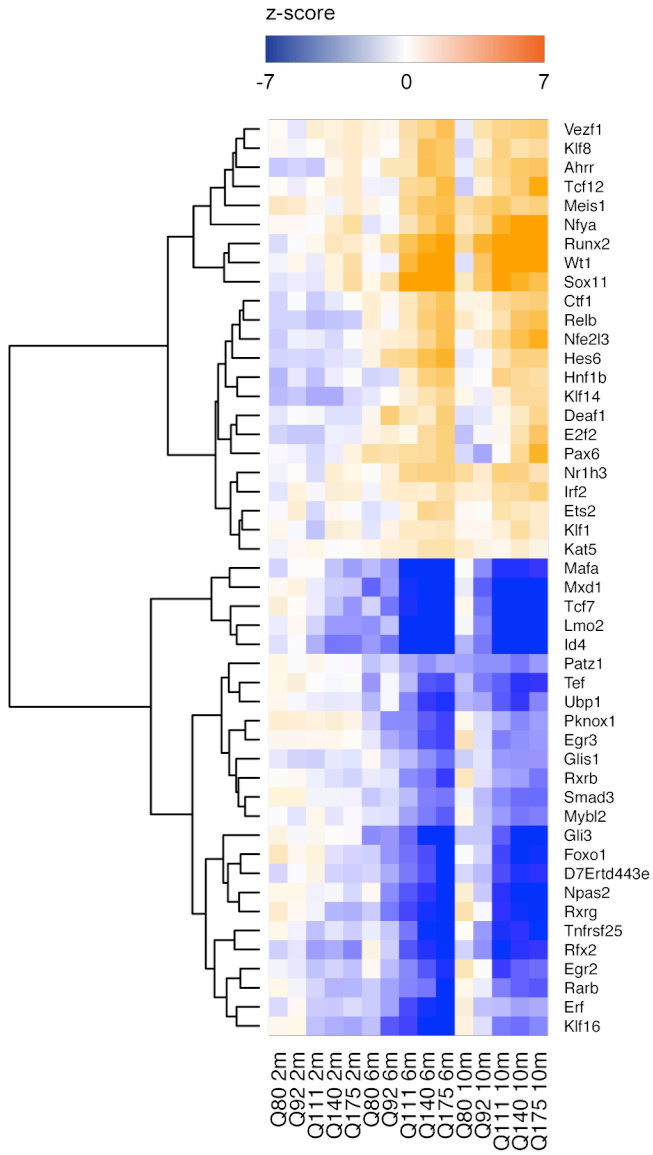

# Appendix Figure S6

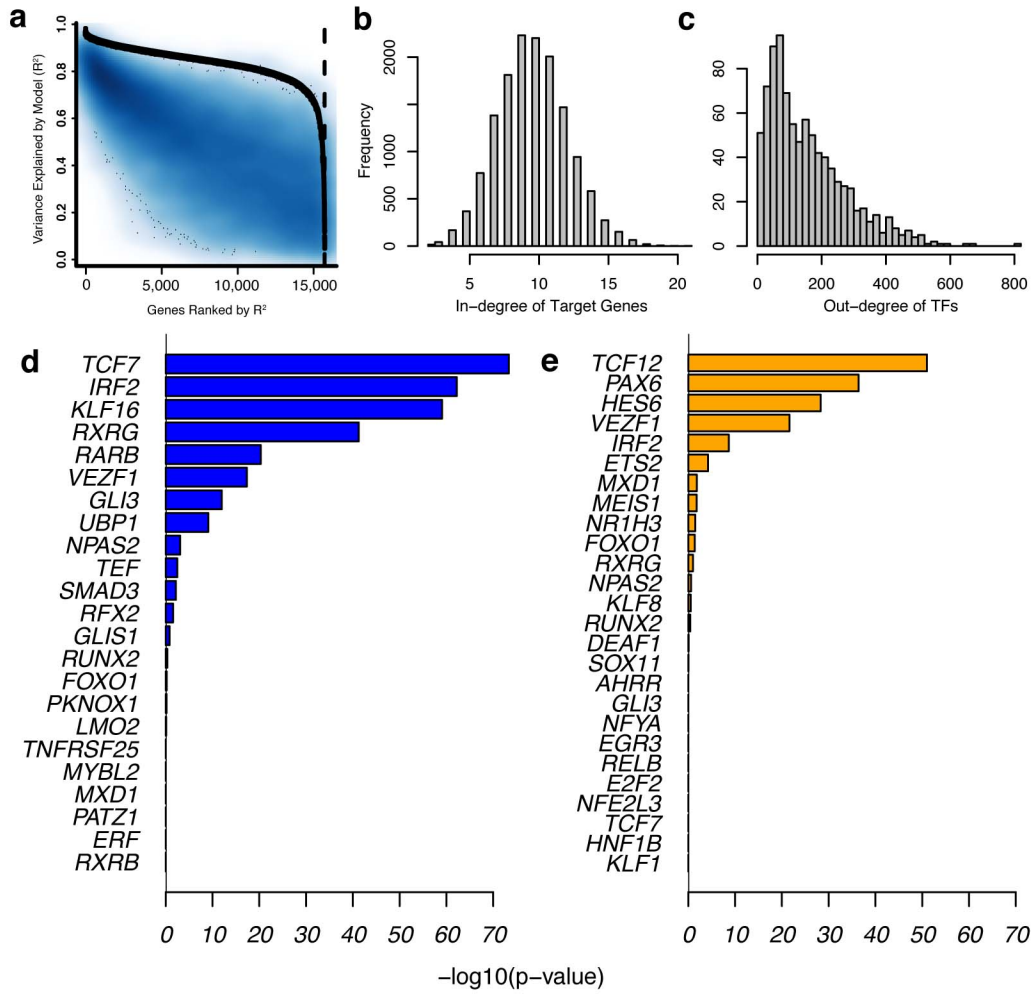



Appendix Figure S7

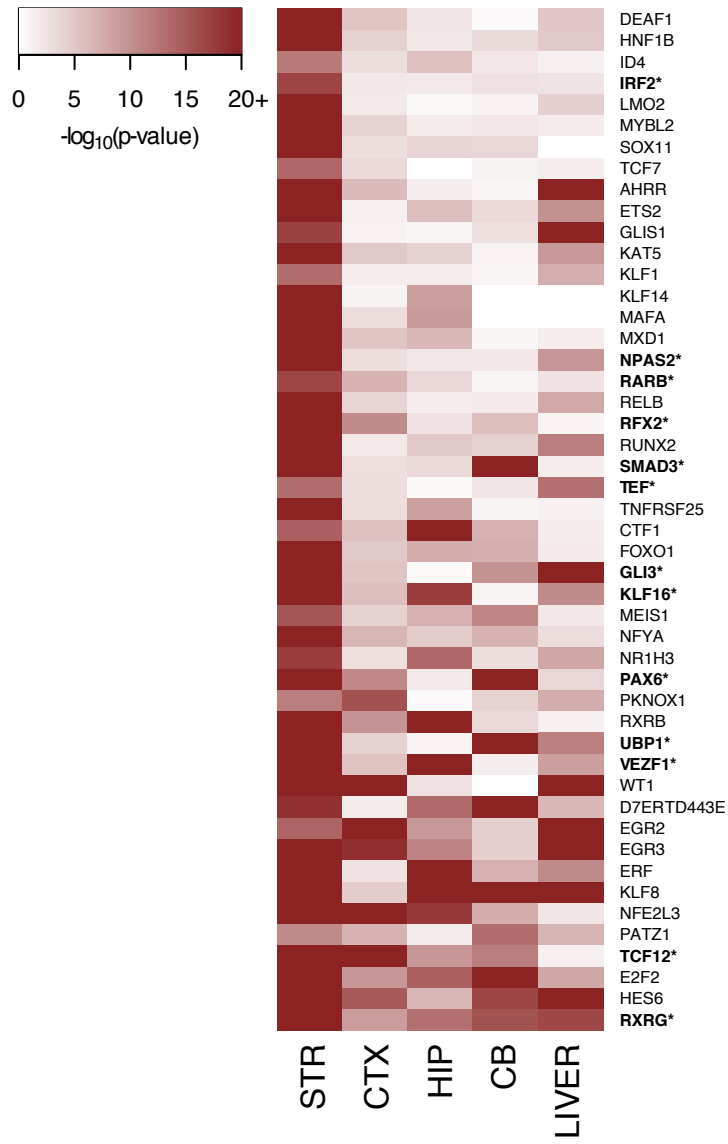

# Appendix Figure S8

**a**

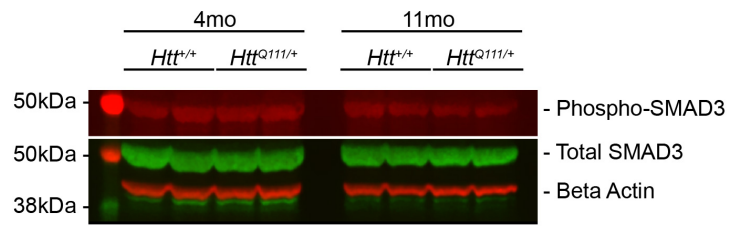

Genotype

*Htt*<sup>+/+</sup>

*Htt*<sup>Q111/+</sup>

**b**

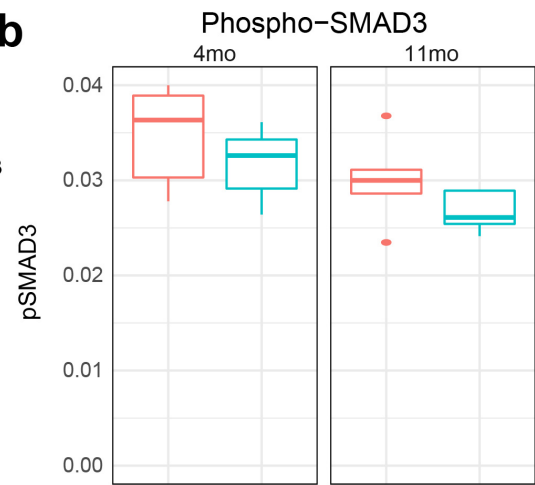

**c**

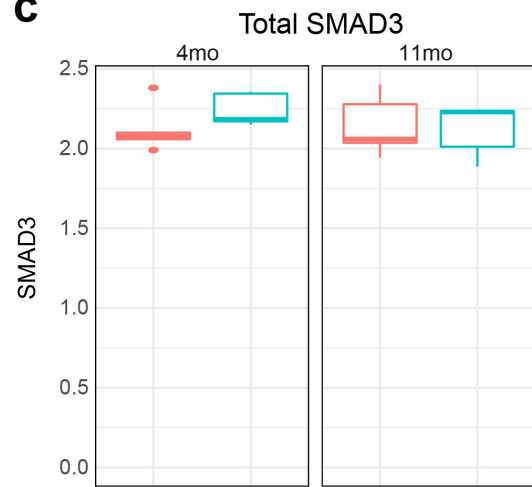

**d**

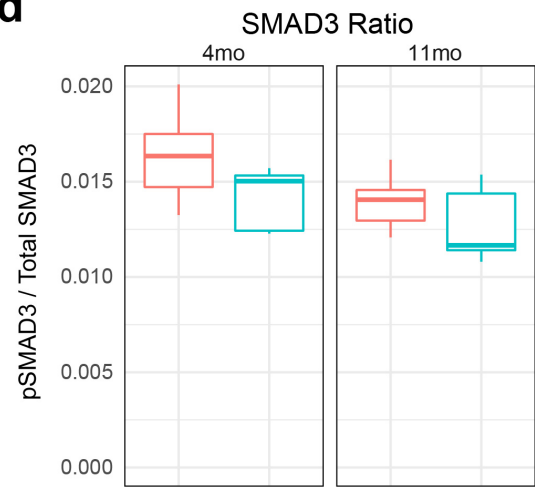

**Appendix Table S1 GO enrichments of top 837 SMAD3 target genes.**

| Term                                          | Set Size | SMAD3 Targets | Odds Ratio | P-Value | FDR     |
|-----------------------------------------------|----------|---------------|------------|---------|---------|
| Actin Filament-Based Process                  | 442      | 41            | 3.6        | 4.2E-11 | 1.9E-07 |
| mRNA Processing                               | 344      | 32            | 3.7        | 4.2E-09 | 9.6E-06 |
| Acting Binding                                | 332      | 30            | 3.6        | 2.1E-08 | 2.4E-05 |
| Neuromuscular Process Controlling Balance     | 59       | 12            | 8.5        | 1.2E-07 | 9.4E-05 |
| Histone Modification                          | 293      | 26            | 3.6        | 1.7E-07 | 1.1E-04 |
| Brain Development                             | 432      | 32            | 2.8        | 1.3E-06 | 4.9E-04 |
| Chromatin Binding                             | 387      | 29            | 2.8        | 2.7E-06 | 9.3E-04 |
| Actin Filament-Based Movement                 | 65       | 11            | 6.8        | 2.8E-06 | 9.3E-04 |
| Regulation of Cell Projection Organization    | 380      | 28            | 2.8        | 4.5E-06 | 1.3E-03 |
| Lamellipodium                                 | 114      | 14            | 4.8        | 5.5E-06 | 1.4E-03 |
| Protein Serine/Threonine Kinase Activity      | 409      | 29            | 2.6        | 9.9E-06 | 2.3E-03 |
| Protein Deacetylation                         | 49       | 9             | 7.5        | 1.1E-05 | 2.4E-03 |
| Centrosome                                    | 350      | 25            | 2.8        | 1.4E-05 | 2.6E-03 |
| Purine Ribonucleotide Catabolic Process       | 382      | 27            | 2.7        | 1.6E-05 | 3.0E-03 |
| Kinase Binding                                | 199      | 18            | 3.4        | 2.3E-05 | 4.0E-03 |
| Phosphoric Ester Hydrolase Activity           | 374      | 26            | 2.6        | 2.5E-05 | 4.0E-03 |
| Neuronal Cell Body                            | 411      | 28            | 2.5        | 2.5E-05 | 4.0E-03 |
| Protein Kinase Binding                        | 369      | 26            | 2.6        | 2.8E-05 | 4.2E-03 |
| Cellular Protein Catabolic Process            | 415      | 28            | 2.5        | 3.0E-05 | 4.2E-03 |
| Transcriptional Repressor Complex             | 70       | 10            | 5.6        | 3.7E-05 | 4.4E-03 |
| Respiratory System Development                | 138      | 14            | 3.8        | 5.5E-05 | 5.3E-03 |
| Kinesin Binding                               | 29       | 6             | 9.5        | 1.1E-04 | 9.3E-03 |
| Endocytosis                                   | 334      | 23            | 2.6        | 1.1E-04 | 9.3E-03 |
| Negative Regulation of ERBB Signaling Pathway | 10       | 4             | 22.1       | 1.4E-04 | 9.7E-03 |
